# Supplementary material for: The ER Unfolded Protein Response Effector, ATF6, Reduces Cardiac Fibrosis and Decreases Activation of Cardiac Fibroblasts
Source: Int J Mol Sci. 2020 Feb 18;21(4):1373. doi: 10.3390/ijms21041373 (PMC7073073; doi:10.3390/ijms21041373)
Supplement: Supplementary file 1 [file ijms-21-01373-s001.pdf]

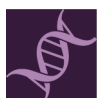

1 **Supplementary Materials:** Supplementary materials can be found at [www.mdpi.com/xxx/s1](http://www.mdpi.com/xxx/s1).

## Supplement Figure 1

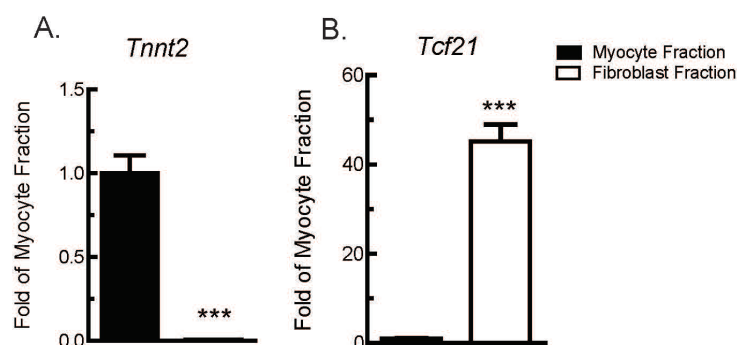

2 **Supplement Figure 1.** qRT-PCR of different fractions isolated from a WT adult mouse heart

3 Fractions are separated by gravity sedimentation as described in Methods. The pellet contains the  
4 adult myocytes (black bars) and the supernatant contains the non-myocyte fraction. Culturing the  
5 non-myocyte fraction for one week (white bars), with regular media changes, allows for the removal  
6 of debris and dead myocytes and the enrichment of cardiac fibroblasts (AMVF). (A) Post-isolation,  
7 the myocyte fraction is positive for the cardiac myocyte marker *Tnnt2* whereas in the cultured  
8 fibroblasts, *Tnnt2* signal is almost completely gone, reflecting the death and removal of any  
9 remaining myocytes. (B) Post-isolation the myocyte fraction is negligible for the common fibroblast  
10 marker *Tcf21* while it is significantly higher in the cultured fibroblast fraction, reflecting fibroblast  
11 enrichment over time. \*\*\* $p \leq 0.001$  by one-way ANOVA.  
12

## Supplement Figure 2

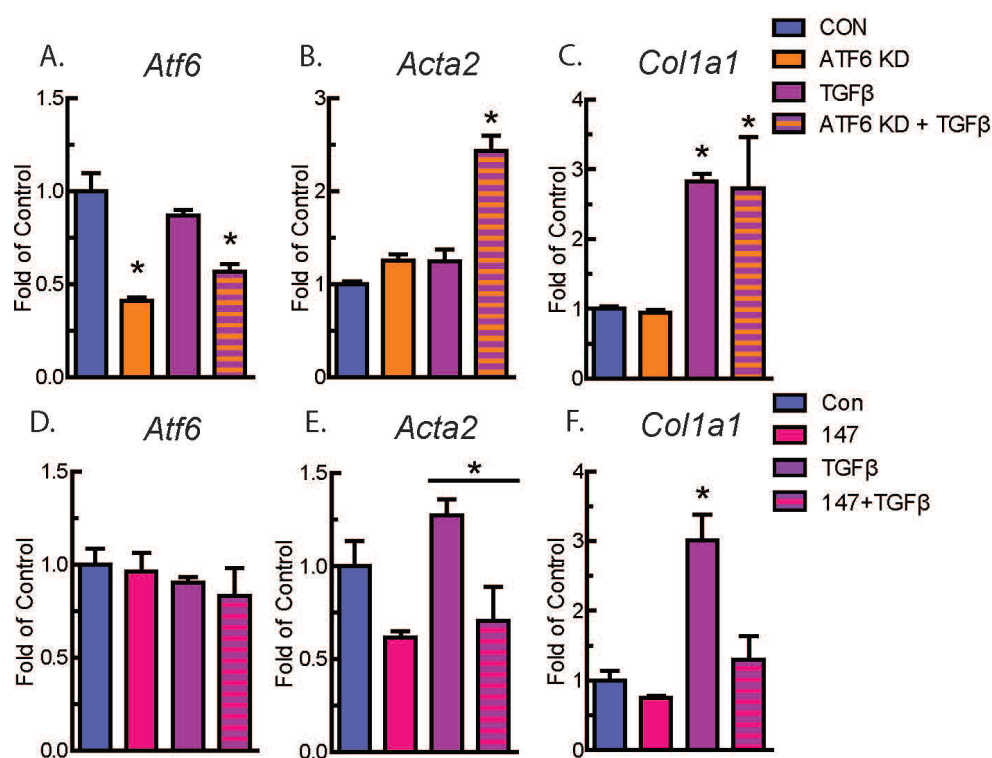

**Supplement Figure 2.** qRT-PCR of NIH 3T3s with ATF6 gain- or loss-of-function.

(A-C) NIH 3T3s were treated  $\pm$  siRNA targeted to murine ATF6. Control (CON) and siRNA-treated cultures (ATF6 KD) were treated  $\pm$  10ng/mL TGF $\beta$  for 48 hours, then analyzed by qRT-PCR for *Atf6*, *Acta2*, and *Col1a1*. (G-I) NIH 3T3s were treated  $\pm$  10 $\mu$ M compound 147, a pharmacological activator of ATF6. Control (CON) and 147-treated cultures (147) were co-treated  $\pm$  10ng/mL TGF $\beta$  for 48 hours, then analyzed by qRT-PCR for *Atf6*, *Acta*, and *Col1a1*. \* $p \leq 0.05$  by one-way ANOVA.

## Supplement Figure 3

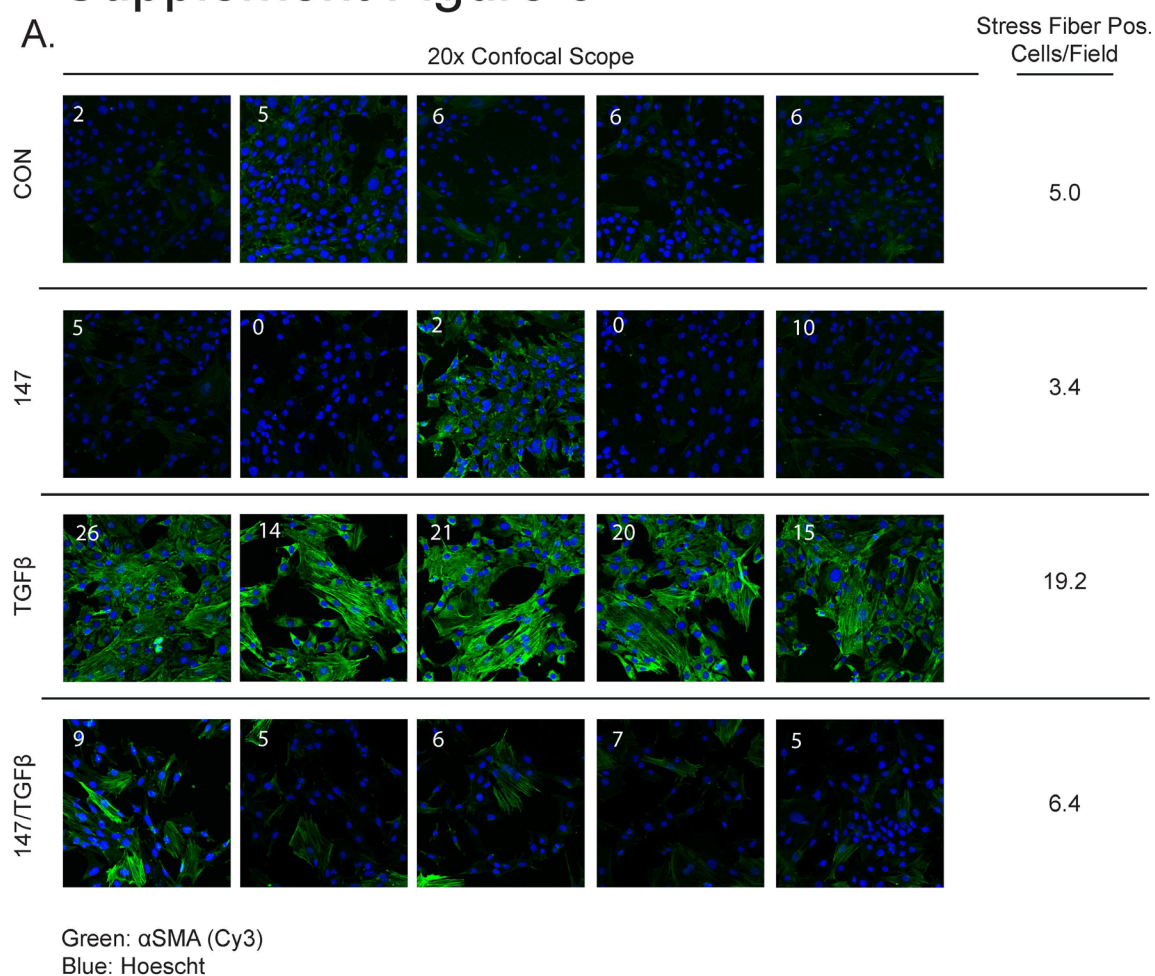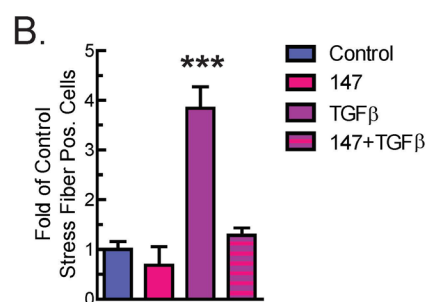

**Supplement Figure 3.** Effects of activating ATP6 on stress fiber formation in NIH 3T3s

(A) NIH 3T3s were treated with  $\pm 10\mu\text{M}$  compound 147 and  $\pm 10\text{ng/mL}$  TGFβ for 48 hours, then analyzed by actin staining for stress fiber formation, which is quantified in (B). All images in (A) were taken with a 20x objective on a confocal scope. In (A) the number in each field represents the number of cells that were stress fiber-positive in that field. The number to the right is the average number of stress-positive cell per field, quantified in (B). \*\*\*  $p \leq 0.001$  by one-way ANOVA.
